# Supplementary material for: A Comparison of the Representation of Women in Editor Positions at Major Medical Journals in 2021 vs 2011
Source: PubMed Central journal article supplement — Acad Med. 2022 Sep 6;98(1):75–9. doi: 10.1097/ACM.0000000000004964 (PMC9780051; doi:10.1097/acm.0000000000004964), 2022-09-06
Supplement: acm-98-075-s001.pdf [file acm-98-075-s001.pdf]

## Supplemental Digital Appendix 1

### Journals Included in a Study Comparing the Representation of Women in Editor Positions in 2021 vs. 2011

| Journal                                                    | Discipline             | Rank 2021 | Rank 2011                   | Journal Impact Factor 2021 | Journal Impact Factor 2011 |
|------------------------------------------------------------|------------------------|-----------|-----------------------------|----------------------------|----------------------------|
| Anesthesiology                                             | Anesthesiology         | 1         | 1                           | 7.10                       | 5.49                       |
| Regional Anesthesia and Pain Medicine                      | Anesthesiology         | 2         | 8                           | 7.00                       | 2.81                       |
| British Journal of Anaesthesia                             | Anesthesiology         | 3         | 3                           | 6.90                       | 4.22                       |
| Journal of Clinical Anesthesia                             | Anesthesiology         | 4         | 18                          | 6.00                       | 1.28                       |
| Anaesthesia                                                | Anesthesiology         | 5         | 7                           | 5.74                       | 3.01                       |
| Pain                                                       | Anesthesiology         | 6         | 2                           | 5.48                       | 5.36                       |
| Anesthesia and Analgesia                                   | Anesthesiology         | 8         | 5                           | 4.31                       | 3.27                       |
| European Journal of Pain                                   | Anesthesiology         | 10        | 4                           | 3.49                       | 3.82                       |
| Lancet Neurology                                           | Clinical Neurology     | 1         | 1                           | 44.18                      | 21.66                      |
| Nature Reviews Neurology                                   | Clinical Neurology     | 2         | 9                           | 42.94                      | 6.51                       |
| Alzheimers & Dementia                                      | Clinical Neurology     | 3         | 12                          | 21.57                      | 5.90                       |
| JAMA Neurology                                             | Clinical Neurology     | 4         | 8                           | 18.30                      | 7.11                       |
| Acta Neuropathologica                                      | Clinical Neurology     | 5         | 7                           | 17.09                      | 7.70                       |
| Brain                                                      | Clinical Neurology     | 6         | 3                           | 13.50                      | 9.23                       |
| Annals of Neurology                                        | Clinical Neurology     | 9         | 2                           | 10.42                      | 10.75                      |
| Neurology                                                  | Clinical Neurology     | 12        | 4                           | 9.91                       | 8.02                       |
| Pain Physician                                             | Clinical Neurology     | 49        | 5                           | 4.97                       | 7.79                       |
| Lancet Respiratory Medicine                                | Critical Care Medicine | 1         | Launched in 2013            | 30.70                      |                            |
| American Journal of Respiratory and Critical Care Medicine | Critical Care Medicine | 2         | 1                           | 21.41                      | 10.19                      |
| Intensive Care Medicine                                    | Critical Care Medicine | 3         | 3                           | 17.70                      | 5.00                       |
| Chest                                                      | Critical Care Medicine | 4         | Not listed in this category | 9.41                       | 7.26                       |
| Critical Care                                              | Critical Care Medicine | 5         | 4                           | 9.10                       | 4.60                       |
| Critical Care Medicine                                     | Critical Care Medicine | 6         | 2                           | 7.60                       | 6.25                       |

Supplemental digital content for Starchl C, Shah V, Zollner-Schwetz I, Knezevic J, Geiger S, Amrein K. A comparison of the representation of women in editor positions at major medical journals in 2021 vs. 2011. Acad Med.

|                                                     |                                 |                                   |                     |       |       |
|-----------------------------------------------------|---------------------------------|-----------------------------------|---------------------|-------|-------|
| Resuscitation                                       | Critical Care<br>Medicine       | 9                                 | 5                   | 5.27  | 4.18  |
| Journal of American<br>Academy of<br>Dermatology    | Dermatology                     | 1                                 | 4                   | 11.53 | 4.27  |
| JAMA Dermatology                                    | Dermatology                     | 2                                 | 5                   | 10.28 | 4.23  |
| British Journal of<br>Dermatology                   | Dermatology                     | 3                                 | 3                   | 9.30  | 4.35  |
| Journal of<br>Investigative<br>Dermatology          | Dermatology                     | 4                                 | 1                   | 8.55  | 6.27  |
| American Journal of<br>Clinical Dermatology         | Dermatology                     | 5                                 | 22                  | 7.40  | 1.96  |
| Pigment Cell and<br>Melanoma Research               | Dermatology                     | 13                                | 2                   | 4.69  | 4.75  |
| Blood                                               | Hematology                      | 1                                 | 2                   | 23.63 | 10.56 |
| Lancet Haematology                                  | Hematology                      | 2                                 | Launched<br>in 2014 | 18.99 |       |
| Journal of Hematology<br>& Oncology                 | Hematology                      | 3                                 | 28                  | 17.39 | 2.93  |
| Circulation Research                                | Hematology                      | 4                                 | 3                   | 17.37 | 9.50  |
| Leukemia                                            | Hematology                      | 5                                 | 4                   | 11.53 | 8.16  |
| Stem Cells                                          | Hematology                      | 13                                | 5                   | 6.28  | 7.87  |
| Circulation                                         | Hematology                      | Not listed in<br>this<br>category | 1                   | 29.69 | 14.43 |
| New England Journal<br>of Medicine                  | Medicine, General &<br>Internal | 1                                 | 1                   | 91.25 | 53.49 |
| Lancet                                              | Medicine, General &<br>Internal | 2                                 | 2                   | 79.32 | 33.63 |
| JAMA                                                | Medicine, General &<br>Internal | 3                                 | 3                   | 56.27 | 30.01 |
| Nature Reviews<br>Disease Primers                   | Medicine, General &<br>Internal | 4                                 | Launched<br>in 2015 | 52.33 |       |
| BMJ-British Medical<br>Journal                      | Medicine, General &<br>Internal | 5                                 | 6                   | 39.90 | 13.47 |
| Annals of Internal<br>Medicine                      | Medicine, General &<br>Internal | 6                                 | 4                   | 25.40 | 16.73 |
| PLoS Medicine                                       | Medicine, General &<br>Internal | 10                                | 5                   | 11.07 | 15.62 |
| Human Reproduction<br>Update                        | Obstetrics &<br>Gynecology      | 1                                 | 1                   | 15.61 | 8.76  |
| American Journal of<br>Obstetrics and<br>Gynecology | Obstetrics &<br>Gynecology      | 2                                 | 9                   | 8.66  | 3.31  |
| Obstetrics and<br>Gynecology                        | Obstetrics &<br>Gynecology      | 3                                 | 2                   | 7.66  | 4.39  |
| Fertility and Sterility                             | Obstetrics &<br>Gynecology      | 4                                 | 4                   | 7.33  | 3.96  |

Supplemental digital content for Starchl C, Shah V, Zollner-Schwetz I, Knezevic J, Geiger S, Amrein K. A comparison of the representation of women in editor positions at major medical journals in 2021 vs. 2011. Acad Med.

|                                                                    |                               |    |                             |       |       |
|--------------------------------------------------------------------|-------------------------------|----|-----------------------------|-------|-------|
| Ultrasound in Obstetrics & Gynecology                              | Obstetrics & Gynecology       | 5  | 10                          | 7.30  | 3.16  |
| Human Reproduction                                                 | Obstetrics & Gynecology       | 6  | 3                           | 6.92  | 4.36  |
| Gynecologic Oncology                                               | Obstetrics & Gynecology       | 8  | 5                           | 5.48  | 3.76  |
| Seminars in Reproductive Medicine                                  | Included in first publication | 76 | 6                           | 1.30  | 3.37  |
| Progress in Retinal and Eye Research                               | Ophthalmology                 | 1  | 1                           | 21.20 | 10.34 |
| Ophthalmology                                                      | Ophthalmology                 | 2  | 2                           | 12.08 | 5.02  |
| JAMA Ophthalmology                                                 | Ophthalmology                 | 3  | 4                           | 7.39  | 3.52  |
| Annual Review of Vision Science                                    | Ophthalmology                 | 4  | Launched in 2015            | 6.42  |       |
| Survey of Ophthalmology                                            | Ophthalmology                 | 5  | 6                           | 6.048 | 3.151 |
| American Journal of Ophthalmology                                  | Ophthalmology                 | 6  | 3                           | 5.26  | 4.29  |
| Investigative Ophthalmology & Visual Science                       | Ophthalmology                 | 8  | 5                           | 4.80  | 3.47  |
| Journal of Physiotherapy                                           | Orthopedics                   | 1  | Not listed in this category | 7.00  | 0.56  |
| Osteoarthritis and Cartilage                                       | Orthopedics                   | 2  | 1                           | 6.57  | 3.95  |
| American Journal of Sports Medicine                                | Orthopedics                   | 3  | 2                           | 6.20  | 3.82  |
| Bone & Joint Research                                              | Orthopedics                   | 4  | Launched in 2012            | 5.85  |       |
| Journal of Bone and Joint Surgery-American Volume                  | Orthopedics                   | 5  | 6                           | 5.28  | 2.97  |
| Arthroscopy                                                        | Orthopedics                   | 8  | 3                           | 4.77  | 3.32  |
| Spine Journal                                                      | Orthopedics                   | 15 | 4                           | 4.17  | 3.02  |
| Journal of Orthopaedic Research                                    | Orthopedics                   | 19 | 5                           | 3.49  | 2.98  |
| JAMA Pediatrics                                                    | Pediatrics                    | 1  | 4                           | 16.19 | 4.03  |
| Lancet Child & Adolescent Health                                   | Pediatrics                    | 2  | Launched in 2017            | 11.29 |       |
| Journal of The American Academy of Child and Adolescent Psychiatry | Pediatrics                    | 3  | 2                           | 8.83  | 5.15  |
| Pediatrics                                                         | Pediatrics                    | 4  | 1                           | 7.13  | 5.39  |

Supplemental digital content for Starchl C, Shah V, Zollner-Schwetz I, Knezevic J, Geiger S, Amrein K. A comparison of the representation of women in editor positions at major medical journals in 2021 vs. 2011. Acad Med.

|                                                             |                                               |                             |    |       |      |
|-------------------------------------------------------------|-----------------------------------------------|-----------------------------|----|-------|------|
| Pediatric Allergy and Immunology                            | Pediatrics                                    | 5                           | 10 | 6.38  | 2.87 |
| Journal of Pediatrics                                       | Pediatrics                                    | 11                          | 3  | 4.41  | 4.04 |
| Developmental Disabilities Research Reviews                 | Pediatrics                                    | Not listed in this category | 5  |       | 3.44 |
| JACC-Cardiovascular Imaging                                 | Radiology, Nuclear Medicine & Medical Imaging | 1                           | 4  | 14.81 | 5.53 |
| Radiology                                                   | Radiology, Nuclear Medicine & Medical Imaging | 2                           | 2  | 11.11 | 6.07 |
| Journal of Nuclear Medicine                                 | Radiology, Nuclear Medicine & Medical Imaging | 3                           | 1  | 10.06 | 7.02 |
| IEEE Transactions on Medical Imaging                        | Radiology, Nuclear Medicine & Medical Imaging | 4                           | 17 | 10.05 | 3.64 |
| European Journal of Nuclear Medicine and Molecular Imaging* | Radiology, Nuclear Medicine & Medical Imaging | 5                           | 6  | 9.24  | 5.04 |
| Neuroimage                                                  | Radiology, Nuclear Medicine & Medical Imaging | 13                          | 3  | 6.56  | 5.94 |
| Human Brain Mapping                                         | Radiology, Nuclear Medicine & Medical Imaging | 24                          | 5  | 5.04  | 5.11 |
| JAMA Surgery                                                | Surgery                                       | 1                           | 5  | 14.77 | 4.50 |
| Annals of Surgery                                           | Surgery                                       | 2                           | 1  | 12.99 | 7.47 |
| Journal of Neurology Neurosurgery and Psychiatry            | Surgery                                       | 3                           | 4  | 10.28 | 4.79 |
| Journal of Heart and Lung Transplantation                   | Surgery                                       | 4                           | 20 | 10.25 | 3.43 |
| Endoscopy                                                   | Surgery                                       | 5                           | 2  | 10.10 | 6.10 |
| American Journal of Transplantation                         | Surgery                                       | 6                           | 3  | 8.09  | 6.05 |

\*Excluded because of missing data
